# Supplementary material for: Integrated comparative metabolomics and network pharmacology approach to uncover the key active ingredients of Polygonati rhizoma and their therapeutic potential for the treatment of Alzheimer’s disease
Source: Front Pharmacol. 2022 Aug 4;13:934947. doi: 10.3389/fphar.2022.934947 (PMC9385993; doi:10.3389/fphar.2022.934947)
Supplement: Supplementary file 1 [file Table2.XLSX]

## Sheet: Sheet1
Index	Formula	Compounds	Class I	Class II	CAS	Level	SGHJ1	SGHJ2	SGHJ3	DHHJ1	DHHJ2	DHHJ3	VIP	Fold_Change	LogFC	Type
pmb0501	C5H14N4	Agmatine	Alkaloids	Phenolamine	306-60-5	A	71046	9	9	1111000	806960	1010200	1.72308	41.2045	5.36473	up
ML10197929	C4H9N3O2	Creatine	Others	Others	57-00-1	B	23941	102140	162390	7204.9	6033.6	9	1.1767	0.0459232	-4.44463	down
mws0005	C10H12N2	Tryptamine	Alkaloids	Plumerane	61-54-1	B	28101	18966	23926	489120	191970	1017200	1.09071	23.9219	4.58026	up
pmb0142	C9H8O3	Caffeic aldehyde	Phenolic acids	Phenolic acids	141632-15-7	B	9	2081.8	9	6824.9	4554	8551.3	1.26267	9.49148	3.24663	up
pme0376	C15H12O5	Naringenin (5,7,4'-Trihydroxyflavanone)	Flavonoids	Dihydroflavone	480-41-1	A	5360.4	8198.1	9	44883	35590	60341	1.09129	10.3788	3.37556	up
pme3475	C15H12O5	Butin	Flavonoids	Dihydroflavone	492-14-8	A	6669.5	6904.6	9	49300	64946	86139	1.15687	14.7525	3.88289	up
mws0914	C15H12O5	Pinobanksin	Flavonoids	Dihydroflavonol	548-82-3	A	6612.9	9379.5	9	67790	58208	96094	1.15166	13.8795	3.79489	up
pme2960	C15H12O5	Naringenin chalcone	Flavonoids	Chalcones	73692-50-9	A	5669.2	8835.3	9	91580	80308	135300	1.23015	21.1657	4.40365	up
mws1422	C15H14O5	Epiafzelechin	Flavonoids	Flavanols	24808-04-6	B	9	11063	9	35558	31447	71901	1.42532	12.5355	3.64795	up
Lmgp004784	C15H14O5	Apiferol	Flavonoids	Flavonoid	55167-29-8	B	9	9	9	97928	22179	95059	1.9194	7969.11	12.9602	up
pmn001511	C13H18O7	3-Hydroxy-5-Methylphenol-1-O-Glucoside	Phenolic acids	Phenolic acids	-	B	9	9	9	2592.1	2547.9	9	1.05979	190.704	7.57519	up
mws0064	C15H12O6	Eriodictyol (5,7,3',4'-Tetrahydroxyflavanone)	Flavonoids	Dihydroflavone	552-58-9	A	9	9	9	95143	42793	144000	1.96015	10442.1	13.3501	up
Zmpn002440	C15H12O6	3,4,2',4',6'-Pentahydroxychalcone	Flavonoids	Chalcones	14917-41-0	B	9	9	9	146040	60122	212460	2.00105	15504.5	13.9204	up
Lmgp004167	C15H14O6	3',4,4',5,7-Pentahydroxyflavan (Luteoforol)	Flavonoids	Flavonoid	13392-26-2	B	9	9	9	45715	11112	41700	1.83443	3649.15	11.8333	up
pmb0502	C16H25N3O2	p-Coumaroylspermidine	Alkaloids	Phenolamine	-	A	35778	138780	51991	5095800	5718100	5035500	1.35382	69.9601	6.12846	up
Lmjp004941	C16H12O6	Rhamnocitrin (7-Methylkaempferol)	Flavonoids	Flavonoid	569-92-6	B	1599.2	1007.5	3253.2	144930	32373	97138	1.23788	46.8337	5.54948	up
pmp000548	C16H12O6	Pratensein	Flavonoids	Isoflavones	2284-31-3	B	1890.5	1930.2	3184.9	150030	32512	97448	1.19975	39.9666	5.32072	up
pmp000001	C16H12O6	Hispidulin (5,7,4'-Trihydroxy-6-methoxyflavone)	Flavonoids	Flavonoid	1447-88-7	B	1101.2	2514.5	2767	143600	32280	99133	1.2186	43.0873	5.42919	up
Zmhp003514	C16H12O6	6,7,8-Tetrahydroxy-5-methoxyflavone	Flavonoids	Flavonoid	-	B	9	9	3062.6	148820	34064	100310	1.62272	91.9282	6.52244	up
mws0058	C16H12O6	Diosmetin (5,7,3'-Trihydroxy-4'-methoxyflavone)	Flavonoids	Flavonoid	520-34-3	A	4199.5	4106.1	7744.8	305540	66706	207100	1.18265	36.0954	5.17374	up
mws1564	C17H16O5	Farrerol (6,8-Dimethyl-5,7,4'-trihydroxyflavanone)	Flavonoids	Dihydroflavone	24211-30-1	B	9	9	9	45686	14648	30964	1.83631	3381.41	11.7234	up
Lmhn001477	C13H12O9	2-Caffeoyl-L-tartaric acid (Caftaric acid)	Phenolic acids	Phenolic acids	67879-58-7	B	9	9	9	31092	10179	34067	1.80992	2790.3	11.4462	up
Hmdn005741	C18H16O5	4',5,7-Trihydroxy-6,8-dimethl-homoisoflavanone	Flavonoids	Isoflavones	-	B	9	9	9	1485.1	2026.5	1827.4	1.49165	197.741	7.62747	up
mws0066	C16H12O7	Isorhamnetin*	Flavonoids	Flavonols	480-19-3	B	9	9	9	18529	5070.8	17023	1.73299	1504.55	10.5551	up
pme3459	C20H28O3	Cafestol	Terpenoids	Ditepenoids	469-83-0	B	9	9	9	18700	27825	8830.4	1.77745	2050.2	11.0015	up
Lmsp011053	C18H18O6	7-Hydroxy-2',5,8-Trimethoxyflavanone	Flavonoids	Dihydroflavone	-	B	9	9	9	61752	26098	42621	1.88308	4832.26	12.2385	up
Lmmn001294	C14H20O9	Koaburaside	Phenolic acids	Phenolic acids	41653-73-0	A	140380	332660	95889	9370.7	10223	13753	1.04829	0.0586131	-4.09263	down
Hmmp002150	C19H19NO5	3,5-Bis(3-methoxy-4-hydroxyphenyl)-2,3-dihydro-2(1H)-pyridinone	Alkaloids	Alkaloids	-	B	7490.3	10596	8077.2	160020	119870	115980	1.06747	15.1306	3.9194	up
Lmhn001580	C15H16O10	Sinapoyltartaric acid	Phenolic acids	Phenolic acids	-	B	2431.4	5537.7	3232.7	9	9	9	1.5838	0.00241033	-8.69656	down
pma3724	C17H20O9	1-O-Feruloylquinic acid	Phenolic acids	Phenolic acids	-	B	15553	31323	56060	9	4844.8	9	1.43938	0.047241	-4.40382	down
pmn001695	C16H20O10	Trihydroxycinnamoylquinic acid	Phenolic acids	Phenolic acids	-	B	9	9	9	152910	52415	82387	1.96506	10656	13.3794	up
mws0011	C17H24O9	Syringin	Phenolic acids	Phenolic acids	118-34-3	B	9	9	9	83595	316430	118610	2.01892	19208.7	14.2295	up
mws1565	C17H24O10	Geniposide	Terpenoids	Monoterpenoids	24512-63-8	B	136460	162800	109350	9	16107	20771	1.12726	0.0902743	-3.46954	down
Lmgp004731	C21H20O10	5,7,4'-Trihydroxyisoflavone-7-O-galactoside	Flavonoids	Isoflavones	-	B	5424.8	9	9	15863	18938	20615	1.3501	10.1815	3.34788	up
pmp000438	C30H50O2	Betulin	Terpenoids	Triterpene	473-98-3	B	14874	21909	19664	2830.8	9	9	1.41487	0.0504686	-4.30847	down
mws1172	C22H22O10	Trifolirhizin (Maackiain-3-O-glucoside)	Flavonoids	Isoflavones	6807-83-6	A	161060	593510	9	1182200	549670	2112700	1.06004	5.09499	2.34908	up
Zmcp008957	C27H42O5	24-hydroxy Pennogenin	Steroids	Steroidal saponins	113960-61-5	B	375880	760200	137770	9	9	9	2.10367	2.11956e-05	-15.5259	down
pmb3023	C21H22O11	Eriodictyol-8-C-glucoside	Flavonoids	Dihydroflavone	1023271-51-3	B	8848.3	14657	9	9	9	9	1.19137	0.00114824	-9.76636	down
Li512113	C20H20O12	Maleoyl-caffeoylquinic acid	Phenolic acids	Phenolic acids	-	B	9	9991.5	9	19288	33720	22013	1.34057	7.49498	2.90592	up
mad2085	C22H18O11	Caffeoyl-p-coumaroyltartaric acid	Phenolic acids	Phenolic acids	-	B	7825.4	17540	9	9	9	9	1.19282	0.00106406	-9.8762	down
Hmtn001768	C19H27NO12	4-O-(6'-O-D-Xylosyl)-sitosterol	Alkaloids	Alkaloids	-	B	9	9	4716.7	11324	15370	12838	1.30674	8.34942	3.06168	up
Lmpp005784	C21H20O12	6-Methoxyquercetin-3-O-Xyloside	Flavonoids	Flavonols	-	B	30806	23823	9	9	9	9	1.26218	0.000494162	-10.9827	down
Lmyp004444	C22H22O12	Tricin-4'-methylether-3'-O-glucoside	Flavonoids	Flavonols	-	B	9	9	9	35430	17236	9426.2	1.7853	2299.71	11.1672	up
mws1454	C23H26O11	Persicoside	Flavonoids	Dihydroflavone	28978-03-2	B	17610	72581	9	9	9	9	1.2802	0.000299335	-11.706	down
pmb2723	C21H26O13	4-Hydroxycoumarin di-glucoside	Lignans and Coumarins	Coumarins	-	B	39475	102790	180480	9	9	9	1.96632	8.36574e-05	-13.5451	down
pmb0758	C24H26O11	Anisic acid-O-feruloyl glucoside	Phenolic acids	Phenolic acids	-	B	139970	362900	27392	9	9	9	1.98117	5.09182e-05	-14.2615	down
pmb3064	C22H28O13	3-O-p-Coumaroylquinic acid O-glucoside	Phenolic acids	Phenolic acids	-	B	9	9	9	13950	49468	18661	1.81702	3039.96	11.5698	up
pmn001642	C23H20O13	Kaempferol-3-O-(2''-O-acetyl)glucuronide	Flavonoids	Flavonols	-	B	9	9	9	297280	188580	352830	2.08461	31062.6	14.9229	up
Hmcp001636	C23H24O13	Limocitrin-7-O-glucoside	Flavonoids	Flavonoid	-	B	9	9	9	156440	95523	103950	1.99714	13182	13.6863	up
pmb0565	C23H24O13	Syringetin-3-O-glucoside	Flavonoids	Flavonoid	40039-49-4	B	9	9	9	155440	117540	103650	2.0043	13949.3	13.7679	up
Hmbn002692	C22H30O14	6'-O-Feruloyl-D-sucrose	Phenolic acids	Phenolic acids	118230-77-6	B	63373	224040	13303	9	9	9	1.90565	8.97857e-05	-13.4432	down
pmn001710	C24H26O13	Rosmarinic acid-3'-O-glucoside	Phenolic acids	Phenolic acids	910028-78-3	B	211550	157800	173890	9430	10445	13035	1.08553	0.060581	-4.04499	down
HJN083	C26H34O11	Lariciresinol-4'-O-glucoside	Lignans and Coumarins	Lignans	143663-00-7	B	214150	125900	174640	9304	12772	15243	1.04472	0.0725077	-3.78572	down
pmp001110	C25H26O13	Apigenin-6-C-xyloside-8-C-arabinoside	Flavonoids	Flavonoid carbonoside	-	A	1871100	2838400	1991000	9	9	9	2.28694	4.02955e-06	-17.9209	down
pma0702	C29H39N3O8	N1,N8-Bis(sinapoyl)spermidine	Alkaloids	Phenolamine	-	B	8891.8	7438.7	9703.5	180200	158550	149400	1.11117	18.7505	4.22886	up
mws1292	C26H28O14	Isoschaftoside	Flavonoids	Flavonoid carbonoside	52012-29-0	B	1483700	2192400	1481800	9	9	9	2.26267	5.23469e-06	-17.5435	down
Zmcp006626	C33H52O9	Pennogenin-3-O-β-D-glucopyranoside	Steroids	Steroidal saponins	37341-36-9	A	818600	1294400	1857700	3649	9	9	1.96027	0.000923515	-10.0806	down
Lmsn002815	C27H30O15	Kaempferol-3-O-rutinoside(Nicotiflorin)	Flavonoids	Flavonoid	17650-84-9	A	9	9	9	145610	28353	13613	1.86412	6947.26	12.7622	up
pme1665	C27H30O15	Isovitexin-7-O-glucoside(Saponarin)	Flavonoids	Flavonoid carbonoside	20310-89-8	A	3803	3499.3	4586.7	9	9	2194.4	1.16423	0.186088	-2.42594	down
Zmcp003989	C27H30O15	Kaempferol-3-O-α-L-rhamnosyl(1→2)-β-D--glucopyranoside	Flavonoids	Flavonoid	-	A	15672	30527	9	9	9	9	1.24432	0.000584314	-10.741	down
mws0059	C27H30O16	Quercetin-3-O-rutinoside (Rutin)*	Flavonoids	Flavonols	153-18-4	A	9	9	9	2870700	602830	630110	2.21194	151987	17.2136	up
pmn001583	C27H30O16	Quercetin-3-O-robinobioside*	Flavonoids	Flavonols	52525-35-6	A	9	9	5312.4	3296700	651490	807090	1.92834	892.106	9.80107	up
Rfmb26201	C30H38O14	Syringaresinol-4'-O-(6''-acetyl)glucoside	Lignans and Coumarins	Lignans	-	B	3914.3	6415.5	2030.5	92077	76809	96966	1.14314	21.5085	4.42684	up
pmp000241	C27H28O17	Luteolin-6-C-(2''-glucuronyl)glucoside	Flavonoids	Flavonoid	-	B	9	3783.9	9	25485	25850	29754	1.44899	21.3285	4.41471	up
HJN051	C28H32O16	Tamarixetin-3-O-rutinoside	Flavonoids	Flavonoid	-	A	9	9	9	664480	148560	171690	2.0755	36471.5	15.1545	up
Lmmp002463	C28H32O16	Sexangularetin-3-O-glucoside-7-O-rhamnoside	Flavonoids	Flavonols	-	A	9	9	9	3079000	756090	970060	2.23626	177969	17.4413	up
pme1540	C28H32O16	Isorhamnetin-3-O-neohesperidoside	Flavonoids	Flavonols	55033-90-4	A	36941	40855	7052.2	9	9	9	1.80441	0.000318215	-11.6177	down
Hmln002149	C29H36O15	Acteoside	Phenolic acids	Phenolic acids	61276-17-3	B	9	9	9	16520	13234	55737	1.81335	3166.33	11.6286	up
pmp000596	C27H30O17	Quercetin-3-O-(2''-O-galactosyl)glucoside	Flavonoids	Flavonols	56782-99-1	B	18152	27943	9	9	9	9	1.24719	0.000585632	-10.7377	down
pmb2970	C28H34O16	Hesperetin-5,7-di-O-glucoside	Flavonoids	Dihydroflavonol	-	B	3747.2	9	12150	9	9	9	1.14479	0.00169745	-9.20241	down
pmb0578	C32H30O15	Luteolin-7-O-(6''-sinapoyl)glucoside	Flavonoids	Flavonoid	-	B	9	9	9	20291	87595	118400	1.91889	8380.96	13.0329	up
pmb0716	C29H34O17	Tricin-4'-O-glucoside-7-O-glucoside	Flavonoids	Flavonoid	-	B	9	9	9	53468	9892.8	85154	1.85749	5500.55	12.4254	up
Hmcp001628	C29H34O18	Limocitrin-3,7-di-O-glucoside	Flavonoids	Flavonoid	-	B	9	9	9	20424	13707	28423	1.80125	2316.81	11.1779	up
Lmgn002253	C31H36O18	Syringoylcaffeoylquinic acid-D-glucose	Phenolic acids	Phenolic acids	-	B	29050	54010	4640.4	9	9	9	1.78289	0.000307866	-11.6654	down
Cmdp004421	C39H60O13	kingianoside B	Steroids	Steroidal saponins	145867-18-1	A	16885	31671	9	72743	150320	122730	1.04669	7.12021	2.83192	up
Hmdp003401	C39H62O13	Trillin-6'-O-glucoside	Terpenoids	Triterpene Saponin	-	B	9	9	2641.8	5240.7	10968	16959	1.31247	12.47	3.64039	up
HJAP128	C34H42O20	Isorhamnetin-3-O-rutinoside-7-O-rhamnoside	Flavonoids	Flavonoid	-	B	160430	222780	59311	9	9	9	2.00513	6.10141e-05	-14.0005	down
Hmcp001589	C34H42O21	Isorhamnetin-3-O-rutinoside-4'-O-glucoside	Flavonoids	Flavonols	111393-97-6	B	9	9	9	165200	57677	73294	1.96694	10969.3	13.4212	up
mws1150	C35H46O20	Echinacoside	Phenolic acids	Phenolic acids	82854-37-3	B	9	9	9	148530	47239	63985	1.95066	9620.52	13.2319	up
pmb0666	C38H40O19	Apigenin-6-C-glucoside-7-O-(6''-sinapoyl)glucoside	Flavonoids	Flavonoid carbonoside	-	B	9	9	9	2757500	601350	1426500	2.23763	177235	17.4353	up
Zmpp002858	C38H41O19+	Malvidin-3-O-(6''-O-p-coumaroyl)glucoside-5-O-glucoside	Flavonoids	Anthocyanins	-	B	9	9	9	3281200	723780	1527700	2.25112	204914	17.6447	up
Zmcp008692	C44H70O17	Polyphyllin H	Steroids	Steroidal saponins	81917-50-2	B	129050	235860	127200	9	9	9	2.02861	5.48658e-05	-14.1537	down
Zmcp005184	C44H70O18	24-hydroxy Pennogenin-3-O-alpha-L-rhamnopyranosyl-(1→2)-[alpha-L-xyloyl-(1→4)]-beta-D-glucopyranoside	Steroids	Steroidal saponins	-	B	132820	172580	129410	9	9	9	2.02011	6.20961e-05	-13.9751	down
Hmdp003423	C45H72O18	Neosibiricoside D	Steroids	Steroidal saponins	880152-67-0	A	7341.8	10789	25254	9	6272.4	9	1.26755	0.144991	-2.78597	down
pmp000766	C43H74O21	Ruscogenin-1-O-acetylrhamnosyl(1,2)rhamnosyl(1,2)glucoside	Steroids	Steroidal saponins	-	B	46251	48836	51030	9	9	9	1.90394	0.000184783	-12.4019	down
Cmdn006559	C45H70O20	kingianoside I	Steroids	Steroidal saponins	1202947-60-1	A	12169	10004	19171	9	9	9	1.7529	0.000653057	-10.5805	down
Hmbn006558	C51H80O22	27-O-(3-Hydroxy-3-methylglutaroyl)spirost-5-ene-3β,27-diol(isonarthogenin)-3-O-rha-(1→2)-O-[glu-(1→4)]-glucoside	Steroids	Steroidal saponins	-	B	2143500	3140500	2293000	9	9	9	2.29859	3.56342e-06	-18.0983	down
Hmdp003288	C51H82O23	Trillin-6'-O-sophorotrioside	Terpenoids	Triterpene Saponin	-	A	9	9	9	181720	293780	351270	2.08278	30621.1	14.9022	up
