# Supplementary material for: Integrated comparative metabolomics and network pharmacology approach to uncover the key active ingredients of Polygonati rhizoma and their therapeutic potential for the treatment of Alzheimer’s disease
Source: Front Pharmacol. 2022 Aug 4;13:934947. doi: 10.3389/fphar.2022.934947 (PMC9385993; doi:10.3389/fphar.2022.934947)
Supplement: Supplementary file 6 [file Table5.XLSX]

## Sheet: Sheet1
Index	Formula	Compounds	Class I	Class II	CAS	Level	SGHJ1	SGHJ2	SGHJ3	HJ1	HJ2	HJ3	VIP	Fold_Change	LogFC	Type
pme1841	C5H14N2	Cadaverine	Alkaloids	Phenolamine	462-94-2	B	9	9	9	113470	46651	13368	1.83767	6425.52	12.6496	up
pmb0501	C5H14N4	Agmatine	Alkaloids	Phenolamine	306-60-5	A	71046	9	9	73540	222150	331680	1.44988	8.82824	3.14213	up
mws0005	C10H12N2	Tryptamine	Alkaloids	Plumerane	61-54-1	B	28101	18966	23926	4267600	2010100	2535100	1.38929	124.136	6.95578	up
pmb0142	C9H8O3	Caffeic aldehyde	Phenolic acids	Phenolic acids	141632-15-7	B	9	2081.8	9	4324.1	2586.9	5511.4	1.14604	5.91599	2.56462	up
pme2598	C8H8O4	3,4-Dihydroxybenzeneacetic acid	Phenolic acids	Phenolic acids	102-32-9	B	31934	51199	34449	9	9	11977	1.36233	0.102014	-3.29316	down
mws4085	C11H12O5	Sinapic acid	Phenolic acids	Phenolic acids	530-59-6	B	49778	55436	59564	16094	9	9	1.40142	0.09778	-3.35432	down
pma1840	C14H20NO3+	4-Coumaroylcholine	Alkaloids	Alkaloids	-	B	5860.9	9	9	8599.7	5360.8	2774.2	1.08002	2.84657	1.50922	up
mws1659	C15H10O5	Emodin	Quinones	Anthraquinone	518-82-1	B	9	9	9	42976	60664	1455.7	1.69243	3892.43	11.9265	up
Lmmp005125	C16H14O4	Pinostrobin Chalcone	Flavonoids	Chalcones	18956-15-5	B	9	9	9	20594	18689	9	1.20204	1455.26	10.5071	up
pme0376	C15H12O5	Naringenin (5,7,4'-Trihydroxyflavanone)	Flavonoids	Dihydroflavone	480-41-1	A	5360.4	8198.1	9	15878	44050	516030	1.12908	42.4513	5.40774	up
pme3475	C15H12O5	Butin	Flavonoids	Dihydroflavone	492-14-8	A	6669.5	6904.6	9	76595	100630	337920	1.26561	37.9254	5.24509	up
mws0914	C15H12O5	Pinobanksin	Flavonoids	Dihydroflavonol	548-82-3	A	6612.9	9379.5	9	22142	49542	716460	1.14924	49.2547	5.62219	up
pme2960	C15H12O5	Naringenin chalcone	Flavonoids	Chalcones	73692-50-9	A	5669.2	8835.3	9	30926	88374	1091500	1.24518	83.4258	6.38242	up
mws1422	C15H14O5	Epiafzelechin	Flavonoids	Flavanols	24808-04-6	B	9	11063	9	33519	40072	175670	1.44714	22.4944	4.4915	up
pme1201	C15H14O5	Phloretin	Flavonoids	Chalcones	60-82-2	A	950350	868010	2107.2	4608300	4176700	15577000	1.06682	13.3823	3.74225	up
pmn001511	C13H18O7	3-Hydroxy-5-Methylphenol-1-O-Glucoside	Phenolic acids	Phenolic acids	-	B	9	9	9	10080	6469.9	11871	1.67559	1052.63	10.0398	up
mws0064	C15H12O6	Eriodictyol (5,7,3',4'-Tetrahydroxyflavanone)	Flavonoids	Dihydroflavone	552-58-9	A	9	9	9	10961	6357.6	35492	1.71617	1955.95	10.9337	up
Zmpn002440	C15H12O6	3,4,2',4',6'-Pentahydroxychalcone	Flavonoids	Chalcones	14917-41-0	B	9	9	9	8241.2	10041	38880	1.72668	2117.12	11.0479	up
Zmhp003514	C16H12O6	6,7,8-Tetrahydroxy-5-methoxyflavone	Flavonoids	Flavonoid	-	B	9	9	3062.6	5922.7	7428.4	27216	1.28333	13.1686	3.71903	up
mws1564	C17H16O5	Farrerol (6,8-Dimethyl-5,7,4'-trihydroxyflavanone)	Flavonoids	Dihydroflavone	24211-30-1	B	9	9	9	2631.7	2550.8	9	1.03166	192.278	7.58705	up
pmp001176	C17H19NO4	Dihydrocaffeoyltyramine	Alkaloids	Phenolamine	-	B	9	9	9	9947.3	12351	9	1.15623	826.196	9.69034	up
mws0463	C16H14O6	Hesperetin	Flavonoids	Dihydroflavone	520-33-2	B	1912.9	3788	9	13969	18781	316160	1.18536	61.1061	5.93325	up
pmb2601	C15H16O7	7-Hydroxycoumarin-O-rhamnoside	Lignans and Coumarins	Coumarins	-	B	9	9	9	12064	8625.2	9985.9	1.68761	1136.11	10.1499	up
Lmhn001477	C13H12O9	2-Caffeoyl-L-tartaric acid (Caftaric acid)	Phenolic acids	Phenolic acids	67879-58-7	B	9	9	9	8235.6	11112	12210	1.69025	1168.8	10.1908	up
Hmdn005741	C18H16O5	4',5,7-Trihydroxy-6,8-dimethl-homoisoflavanone	Flavonoids	Isoflavones	-	B	9	9	9	7544.2	25642	6803.7	1.68928	1481.11	10.5325	up
mws0066	C16H12O7	Isorhamnetin*	Flavonoids	Flavonols	480-19-3	B	9	9	9	101600	104670	893410	2.01231	40728.9	15.3138	up
mws0988	C16H12O7	Rhamnetin (7-O-Methxyl Quercetin)*	Flavonoids	Flavonols	90-19-7	B	9	24983	1825.2	26122	24060	144660	1.03998	7.26556	2.86107	up
pme3459	C20H28O3	Cafestol	Terpenoids	Ditepenoids	469-83-0	B	9	9	9	8068	2952.2	3263.9	1.5765	529.041	9.04724	up
Lmtn002565	C14H18O9	1-O-Vanilloyl-D-Glucose	Phenolic acids	Phenolic acids	-	B	9	9	9	21588	20264	35665	1.7927	2871	11.4873	up
Lmsp011053	C18H18O6	7-Hydroxy-2',5,8-Trimethoxyflavanone	Flavonoids	Dihydroflavone	-	B	9	9	9	25019	70485	23904	1.82526	4422.52	12.1107	up
pmn001518	C13H16O10	1-O-Galloyl-D-glucose*	Phenolic acids	Phenolic acids	58511-73-2	B	25577	69152	15548	9	9	9	1.80922	0.000244838	-11.9959	down
Lmfn000604	C13H16O10	6-O-Galloyl-glucose*	Tannins	Tannin	13186-19-1	B	9	9122.9	4106.4	9	9	9	1.11601	0.00203954	-8.93754	down
Zmln000899	C15H20O9	Syringaldehyde-4-O-glucoside	Phenolic acids	Phenolic acids	-	B	9	9	3726.9	11657	3488.2	7814.9	1.18756	6.13103	2.61613	up
Lmhn001580	C15H16O10	Sinapoyltartaric acid	Phenolic acids	Phenolic acids	-	B	2431.4	5537.7	3232.7	9	9	9	1.5532	0.00241033	-8.69656	down
mws0011	C17H24O9	Syringin	Phenolic acids	Phenolic acids	118-34-3	B	9	9	9	99084	49183	43790	1.88723	7113.22	12.7963	up
Zmcp010827	C27H42O3	Diosgenin	Steroids	Steroidal saponins	512-04-9	A	9	9	9	197970	46267	47025	1.90856	10787.5	13.3971	up
pmn001316	C18H24O11	Regaloside L	Phenolic acids	Phenolic acids	138797-43-0	B	8850.6	14338	9654.8	9	9	9	1.69368	0.000822083	-10.2484	down
mws1620	C27H42O4	Ruscogenin	Steroids	Steroidal saponins	472-11-7	A	9	9	1172.7	7824.8	3814.6	11814	1.30959	19.6972	4.29992	up
mws1434	C21H20O10	Apigenin-6-C-glucoside (Isovitexin)*	Flavonoids	Flavonoid carbonoside	29702-25-8	A	36780	41860	58394	1764600	2107400	1276000	1.20761	37.5673	5.23141	up
Lmgp004731	C21H20O10	5,7,4'-Trihydroxyisoflavone-7-O-galactoside	Flavonoids	Isoflavones	-	B	5424.8	9	9	92191	61583	86166	1.54949	44.0839	5.46218	up
pmb3006	C21H20O10	Apigenin-7-O-glucoside(Cosmosiin)	Flavonoids	Flavonoid	578-74-5	B	6631.5	6372.3	9	75453	85647	111360	1.20056	20.9378	4.38804	up
mws0048	C21H20O10	Apigenin-8-C-Glucoside (Vitexin)*	Flavonoids	Flavonoid carbonoside	3681-93-4	A	35065	37380	52826	1727200	1943000	1132500	1.20954	38.3385	5.26072	up
pmp000413	C21H20O10	Genistein-8-C-glucoside	Flavonoids	Isoflavones	66026-80-0	A	14538	10043	14129	471760	560790	336300	1.19663	35.3617	5.14411	up
pmp001034	C27H44O4	Markogenin	Steroids	Steroidal saponins	562-35-6	B	9	9	9	7391.6	9	6353.5	1.13575	509.411	8.99269	up
Cmzn005251	C21H22O10	6-O-Caffeoylarbutin	Phenolic acids	Phenolic acids	136172-60-6	B	5840.6	16788	9	92481	47365	194760	1.13671	14.781	3.88567	up
HJN055	C21H24O10	Dihydrocharcone-4'-O-glucoside	Others	Others	-	A	29889	37026	9	103500	73019	459390	1.02289	9.50196	3.24822	up
mws1172	C22H22O10	Trifolirhizin (Maackiain-3-O-glucoside)	Flavonoids	Isoflavones	6807-83-6	A	161060	593510	9	465060	1546800	5197800	1.09496	9.55455	3.25619	up
Zmcp008957	C27H42O5	24-hydroxy Pennogenin	Steroids	Steroidal saponins	113960-61-5	B	375880	760200	137770	33288	9	9	1.60444	0.0261459	-5.25727	down
Lmlp005236	C21H22O11	Dihydrokaempferol-3-O-glucoside	Flavonoids	Dihydroflavonol	1049-08-8	B	20533	54885	9	316250	241280	405590	1.16161	12.7689	3.67456	up
Li512113	C20H20O12	Maleoyl-caffeoylquinic acid	Phenolic acids	Phenolic acids	-	B	9	9991.5	9	27016	12529	11823	1.23736	5.13192	2.3595	up
pmn001700	C30H48O3	24,30-Dihydroxy-12(13)-enolupinol	Terpenoids	Triterpene	-	B	12102	38002	13925	9	9	9	1.75542	0.000421684	-11.2116	down
Hmdn001667	C20H16O13	Ellagic acid-4-O-glucoside	Tannins	Tannin	-	B	9	11703	9	20538	42875	511950	1.46197	49.0882	5.6173	up
Lmpp005784	C21H20O12	6-Methoxyquercetin-3-O-Xyloside	Flavonoids	Flavonols	-	B	30806	23823	9	9	9	9	1.23829	0.000494162	-10.9827	down
Lmzp002365	C22H24O11	Hesperetin-7-O-glucoside*	Flavonoids	Flavonoid	31712-49-9	B	19179	44980	9	121480	188820	988090	1.15784	20.2342	4.33873	up
Lmjp003044	C22H22O12	Isorhamnetin-3-O-Glucoside	Flavonoids	Flavonols	5041-82-7	B	9	9	9	43514	40655	923240	1.94142	37311.4	15.1873	up
Lmyp004444	C22H22O12	Tricin-4'-methylether-3'-O-glucoside	Flavonoids	Flavonols	-	B	9	9	9	46426	32635	873000	1.9336	35261.5	15.1058	up
mws1454	C23H26O11	Persicoside	Flavonoids	Dihydroflavone	28978-03-2	B	17610	72581	9	9	9	9	1.25658	0.000299335	-11.706	down
Lmgp003989	C25H22O11	Dicaffeoylshikimic acid	Phenolic acids	Phenolic acids	-	B	9	9	9	9980.9	10931	7570.7	1.67758	1054.91	10.0429	up
Hmcp001636	C23H24O13	Limocitrin-7-O-glucoside	Flavonoids	Flavonoid	-	B	9	9	9	55391	43082	40736	1.86029	5155.89	12.332	up
pmb0565	C23H24O13	Syringetin-3-O-glucoside	Flavonoids	Flavonoid	40039-49-4	B	9	9	9	45888	37265	47783	1.85441	4849.48	12.2436	up
pmp000194	C24H22O13	6''-O-Malonylgenistin	Flavonoids	Isoflavones	51011-05-3	B	9	9	9	107700	108150	68338	1.93437	10525.5	13.3616	up
pmb3041	C23H22O14	Tricin-7-O-saccharic acid	Flavonoids	Flavonoid	-	B	61509	49005	57223	9	9	9	1.88112	0.000160966	-12.601	down
pmp001110	C25H26O13	Apigenin-6-C-xyloside-8-C-arabinoside	Flavonoids	Flavonoid carbonoside	-	A	1871100	2838400	1991000	189840	29980	44420	1.16876	0.0394359	-4.66435	down
pmb0686	C24H24O14	Eriodictyol-7-O-(6''-malonyl)glucoside	Flavonoids	Dihydroflavone	-	B	9	9	9	20615	20825	27409	1.78233	2549.96	11.3163	up
pmb2979	C25H26O14	Hesperetin-7-O-(6''-malonyl)glucoside	Flavonoids	Dihydroflavonol	-	B	99904	105060	137320	9	6176.6	17415	1.16416	0.0689503	-3.8583	down
mws1292	C26H28O14	Isoschaftoside	Flavonoids	Flavonoid carbonoside	52012-29-0	B	1483700	2192400	1481800	277250	44815	47210	1.0619	0.0715941	-3.80402	down
Hmdp003400	C33H52O8	Trillin (Diosgenin-3-O-glucoside)	Terpenoids	Triterpene Saponin	14144-06-0	A	9	9	9	918790	100670	119000	2.01548	42165.2	15.3638	up
Lmpp003930	C30H26O12	Apigenin-7-O-(6''-p-Coumaryl)glucoside	Flavonoids	Flavonoid	-	B	9	9	9	843390	255520	231390	2.07164	49270.4	15.5884	up
pme0368	C27H30O14	Apigenin-7-O-rutinoside (Isorhoifolin)	Flavonoids	Flavonoid	552-57-8	B	9	9	9	891550	306590	233610	2.07963	53027.8	15.6945	up
mws0047	C27H30O14	Rhoifolin	Flavonoids	Flavonoid	17306-46-6	B	9	9	9	946200	265740	219610	2.0742	53020.4	15.6943	up
Lmgp004474	C27H30O14	5,7,4'-Trihydroxyisoflavone-7-O-galactoside-rhamnose	Flavonoids	Isoflavones	-	B	6605.1	9	9	836100	280700	210350	1.73601	200.382	7.64661	up
mws0046	C27H32O14	Naringenin-7-O-Neohesperidoside(Naringin)	Flavonoids	Dihydroflavone	10236-47-2	B	9	6354.4	9	46865	12842	17293	1.33345	12.0834	3.59495	up
Zmcp006626	C33H52O9	Pennogenin-3-O-β-D-glucopyranoside	Steroids	Steroidal saponins	37341-36-9	A	818600	1294400	1857700	38299	21069	9	1.42869	0.0149538	-6.06335	down
mws1387	C28H32O15	Spinosin	Flavonoids	Flavonoid carbonoside	72063-39-9	B	9	9	9	20172	11304	14390	1.7326	1698.74	10.7302	up
mws1661	C28H32O15	Diosmetin-7-O-rutinoside (Diosmin)	Flavonoids	Flavonoid	520-27-4	B	9	9	9	95774	60000	53814	1.90129	7762.52	12.9223	up
Lmpp003977	C31H29O13+	Peonidin-3-O-(6''-O-p-Coumaroyl)glucoside	Flavonoids	Anthocyanins	-	B	9	9	9	81472	60076	48641	1.89204	7044.04	12.7822	up
mws0059	C27H30O16	Quercetin-3-O-rutinoside (Rutin)*	Flavonoids	Flavonols	153-18-4	A	9	9	9	51436	4980.5	9	1.17707	2089.83	11.0292	up
Rfmb26201	C30H38O14	Syringaresinol-4'-O-(6''-acetyl)glucoside	Lignans and Coumarins	Lignans	-	B	3914.3	6415.5	2030.5	66003	46691	61454	1.03769	14.0893	3.81653	up
HJN051	C28H32O16	Tamarixetin-3-O-rutinoside	Flavonoids	Flavonoid	-	A	9	9	9	19961	1807.3	9	1.09373	806.567	9.65565	up
Lmmp002463	C28H32O16	Sexangularetin-3-O-glucoside-7-O-rhamnoside	Flavonoids	Flavonols	-	A	9	9	9	111450	8648.1	11410	1.76155	4870.67	12.2499	up
pme1540	C28H32O16	Isorhamnetin-3-O-neohesperidoside	Flavonoids	Flavonols	55033-90-4	A	36941	40855	7052.2	9	9	9	1.76935	0.000318215	-11.6177	down
Hmln002149	C29H36O15	Acteoside	Phenolic acids	Phenolic acids	61276-17-3	B	9	9	9	14579	31872	476760	1.86714	19378.2	14.2421	up
pmp000596	C27H30O17	Quercetin-3-O-(2''-O-galactosyl)glucoside	Flavonoids	Flavonols	56782-99-1	B	18152	27943	9	214300	345880	1082000	1.27699	35.619	5.15458	up
pmp001310	C27H30O17	6-Hydroxykaempferol-3,6-O-Diglucoside	Flavonoids	Flavonols	-	B	21442	62180	9	240960	705260	5782000	1.33132	80.4513	6.33004	up
Lmtp003677	C27H30O17	Quercetin-3-O-sophoroside (Baimaside)	Flavonoids	Flavonols	18609-17-1	B	25692	67524	9	274830	724810	5956900	1.32392	74.621	6.22151	up
pmn001533	C26H30O19	2-O-Di-gallic acyl-Glucoside-Glucoside	Phenolic acids	Phenolic acids	-	B	9	9	9	13910	4998.6	7678.7	1.65835	984.715	9.94356	up
pmb0578	C32H30O15	Luteolin-7-O-(6''-sinapoyl)glucoside	Flavonoids	Flavonoid	-	B	9	9	9	143770	111170	87121	1.95413	12668.9	13.629	up
pmb0716	C29H34O17	Tricin-4'-O-glucoside-7-O-glucoside	Flavonoids	Flavonoid	-	B	9	9	9	64947	164180	283610	1.97816	18990.3	14.213	up
Hmcp001628	C29H34O18	Limocitrin-3,7-di-O-glucoside	Flavonoids	Flavonoid	-	B	9	9	9	33548	129220	136940	1.92032	11100.3	13.4383	up
HJN102	C34H30O15	3,4,5-Tricaffeoylquinic acid	Phenolic acids	Phenolic acids	86632-03-3	B	9	9	9	18973	19266	11144	1.73984	1829	10.8368	up
Lmgn002253	C31H36O18	Syringoylcaffeoylquinic acid-D-glucose	Phenolic acids	Phenolic acids	-	B	29050	54010	4640.4	9	9	9	1.74849	0.000307866	-11.6654	down
pmn001369	C32H42O17	1-Hydroxypineolin Diglucoside	Lignans and Coumarins	Lignans	-	B	9	9	9	5352.2	10786	7428.1	1.64986	872.826	9.76955	up
Cmdp004421	C39H60O13	kingianoside B	Steroids	Steroidal saponins	145867-18-1	A	16885	31671	9	244620	136470	254260	1.14361	13.0825	3.70956	up
Hmdp003401	C39H62O13	Trillin-6'-O-glucoside	Terpenoids	Triterpene Saponin	-	B	9	9	2641.8	46844	3941.9	5598.4	1.27674	21.1987	4.4059	up
mws1035	C33H40O19	Kaempferol-3-O-robinoside-7-O-rhamnoside (Robinin)	Flavonoids	Flavonols	301-19-9	B	9	9	9	39690	11025	11545	1.74467	2305.93	11.1711	up
HJAP128	C34H42O20	Isorhamnetin-3-O-rutinoside-7-O-rhamnoside	Flavonoids	Flavonoid	-	B	160430	222780	59311	9	9	9	1.96615	6.10141e-05	-14.0005	down
Zmcp008692	C44H70O17	Polyphyllin H	Steroids	Steroidal saponins	81917-50-2	B	129050	235860	127200	5458	1922.1	866.08	1.30288	0.0167568	-5.89911	down
Cmdp004914	C45H72O17	Gracillin	Steroids	Steroidal saponins	19083-00-2	A	9	9	9	13888000	2129900	4072000	2.3114	744070	19.5051	up
pmp001041	C45H74O18	Timosaponin B-III	Steroids	Steroidal saponins	139051-27-7	B	9	9	9	64403	21323	36775	1.83467	4537.07	12.1475	up
Hmdp002882	C45H70O19	(25S)-Pratioside D1	Steroids	Steroidal saponins	1173921-55-5	A	9	9	8884.8	113650	57660	119280	1.53161	32.6403	5.02858	up
pmp000766	C43H74O21	Ruscogenin-1-O-acetylrhamnosyl(1,2)rhamnosyl(1,2)glucoside	Steroids	Steroidal saponins	-	B	46251	48836	51030	9	9	9	1.86673	0.000184783	-12.4019	down
Cmdp005440	C45H70O20	kingianoside G	Steroids	Steroidal saponins	1173921-54-4	A	9	9	3838.4	19576	10941	18281	1.33312	12.6538	3.6615	up
Zmcp005839	C50H80O21	Parisyunnanoside B	Steroids	Steroidal saponins	945865-37-2	B	9	9	9	114900	12014	19257	1.80077	5413.74	12.4024	up
Zmcp005801	C51H82O21	Diosgenin-3-O-β-D-glc (1 →4)-α-L-rha (1 →4)[ α-L-rha (1 →2)]-β-D-glc	Steroids	Steroidal saponins	113576-37-7	A	9	9	9	908810	87555	170640	2.02353	43222.4	15.3995	up
Hmbn006558	C51H80O22	27-O-(3-Hydroxy-3-methylglutaroyl)spirost-5-ene-3β,27-diol(isonarthogenin)-3-O-rha-(1→2)-O-[glu-(1→4)]-glucoside	Steroids	Steroidal saponins	-	B	2143500	3140500	2293000	9	9	9	2.25377	3.56342e-06	-18.0983	down
Hmdp003288	C51H82O23	Trillin-6'-O-sophorotrioside	Terpenoids	Triterpene Saponin	-	A	9	9	9	819790	478200	884590	2.13712	80836.3	16.3027	up
